# Supplementary material for: Promising thermoelectric candidate based on a CaAs3 monolayer: A first principles study
Source: Royal Society of Chemistry journal article supplement (doi:10.1039/d1cp03071j), 2021-01-01
Supplement: d1cp03071j1.pdf [file d1cp03071j1.pdf]

**Electronic Supplementary Information for Promising  
thermoelectric candidate based on CaAs<sub>3</sub> monolayer: a first  
principles study**

Xin Liu <sup>1</sup>, Dingbo Zhang <sup>1</sup>, Hui Wang <sup>1</sup>, Yuanzheng Chen <sup>1</sup>, Hongyan Wang <sup>1</sup> and  
Yuxiang Ni <sup>1 a)</sup>

<sup>1</sup> School of Physical Science and Technology, Southwest Jiaotong University,  
Chengdu 610031, P. R. China.

**\* Corresponding author.**

Yuxiang Ni

School of Physical Science and Technology, Southwest Jiaotong University, Chengdu  
610031, P. R. China.

**E-mail Address:** [yuxiang.ni@swjtu.edu.cn](mailto:yuxiang.ni@swjtu.edu.cn)

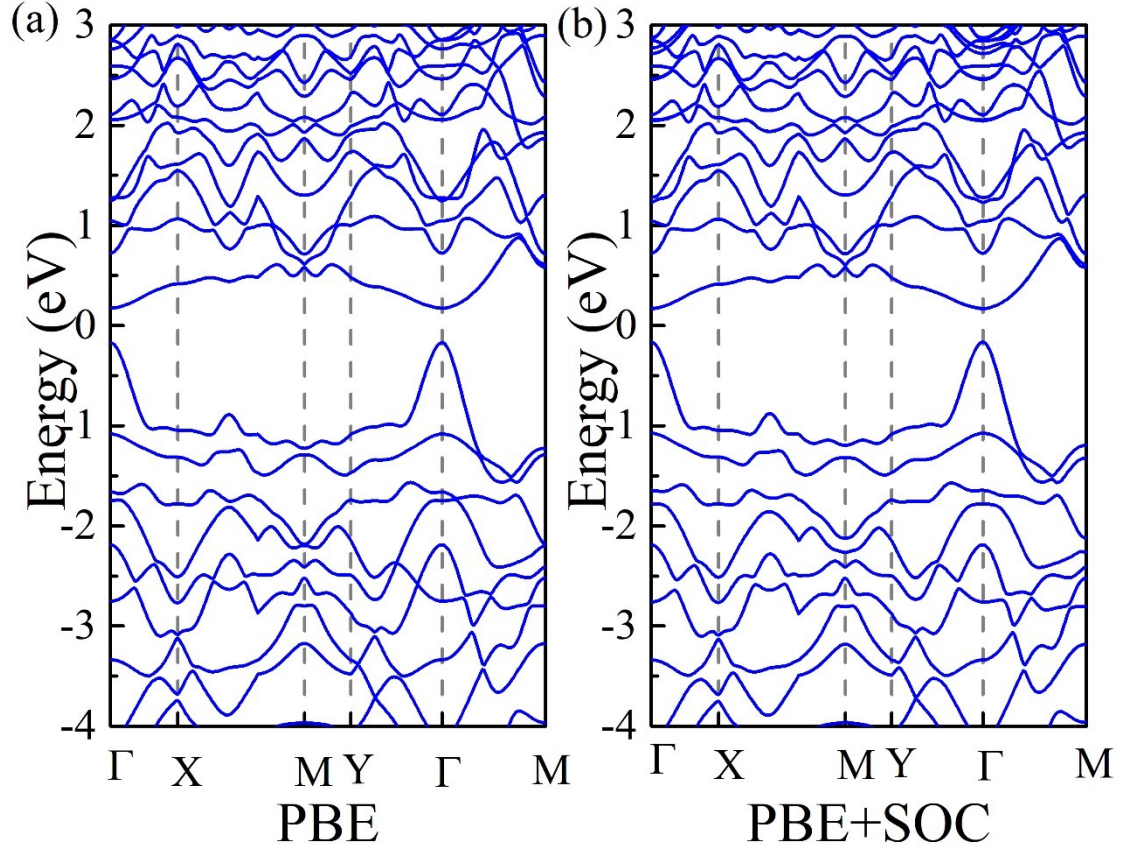

**Fig. S1.** The band structure of  $\text{CaAs}_3$  monolayer calculated from PBE (a) and PBE+SOC (b).

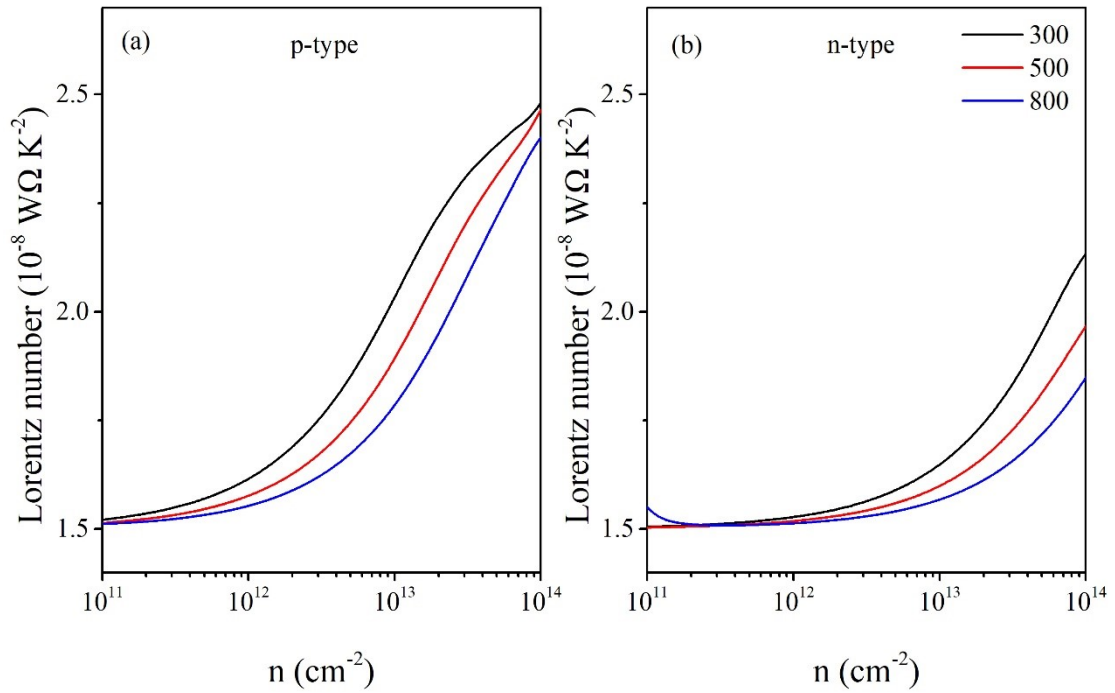

**Fig. S2.** Lorenz number as a function of carrier concentration (holes and electrons) at 300, 500, and 800 K. Based on the Seebeck coefficients, the Lorenz number can be

calculated by  $L = 1.5 + \exp\left[-\frac{|S|}{116}\right]$ .
